# Supplementary material
Source: PubMed Central journal article supplement (PMC6800337)
Supplement: pnas.1911181116.sapp.pdf [file pnas.1911181116.sapp.pdf]

# PNAS

[www.pnas.org](http://www.pnas.org)

Supplementary Information for

**How internal cavities destabilize a protein**

Mengjun Xue, Takuro Wakamoto, Camilla Kejlberg, Yuichi Yoshimura, Tania Aaqvist Nielsen, Michael Wulff Risør, Kristian Wejse Sanggaard, Ryo Kitahara, Frans A.A. Mulder

Corresponding authors: Ryo Kitahara and Frans A.A. Mulder  
E-mail: [ryo@ph.ritsumei.ac.jp](mailto:ryo@ph.ritsumei.ac.jp) and [fmulder@chem.au.dk](mailto:fmulder@chem.au.dk)

**This PDF file includes:**

- Materials and Methods
- Figures S1 to S12
- Tables S1 to S5
- SI References

## Materials and Methods

**Protein sample preparation.** The L99A T4L mutant was based on a cysteine-free background T4 lysozyme (C54T/C97A; WT\*) and expressed in M9 media supplemented with 1g/L  $^{15}\text{NH}_4\text{Cl}$  and 3g/L D-glucose. Purification of T4L was carried out as previously described (1). The  $^{15}\text{N}$ -labeled L99A T4L samples were prepared at 0.4 mM in 50 mM phosphate buffer and 25 mM NaCl at pH 5.5.

**Native state hydrogen exchange.** The protein sample was buffer exchanged into 50 mM phosphate/D<sub>2</sub>O buffer, 25 mM NaCl (pH\* 5.5, meter reading) using a 10 kDa MWCO Amicon centrifugal filter (Merck Millipore Ltd). The protein sample was transferred to a ceramic pressure-resistant NMR cell (Daedalus Innovations, PA, USA) and a series of  $^1\text{H}$ - $^{15}\text{N}$  heteronuclear single quantum coherence (HSQC) spectra were measured at 24 °C on a 600 MHz spectrometer (Bruker BioSpin Co. AVANCE) under constant hydrostatic pressures of 1 bar, 500 bar, 1000 bar, 1500 bar, 2000 bar, and 2500 bar. Spectral analyses were performed using Topspin3.1 and Bruker dynamics center software. Each HSQC spectrum was recorded with 1024 complex data points in the  $^1\text{H}$  dimension and 80 complex data points in the  $^{15}\text{N}$  dimension using 40 scans per increment. Assignments were adapted by tracking pressure-dependence of chemical shifts.

**Considerations for hydrogen exchange at high pressure.** Hydrogen exchange at atmospheric pressure virtually guarantees the EX2 limit under the solution conditions used here (pH\* 5.5, 24 °C) (2). Validity of the EX2 limit at high pressures requires confirmation. The validation of the EX2 implies that  $k_{\text{ex}}$  increases tenfold with every unit of pH. We performed such a test at 2000 bar. Residues for which the EX2 condition applied were identified by slopes of unity in plots of the logarithms of hydrogen exchange rates versus pH (data obtained at pH\* 5.50 and 5.71). Slopes < 0.7 were obtained for residues 24, 25, 52, and 62 and this data was excluded from further analysis.

The amide exchange rates,  $k_{\text{ex}}$ , were obtained by fitting the peak intensities as a function of time to a single exponential decay equation. In instances where an initial increase in intensity was observed we followed the published analysis protocol (3).

In the high-pressure experiments, pressure should be taken into account in the calculations of  $k_{\text{int}}$  (4, 5), in addition to temperature and pH. Pressure effects on the sum of the acid, base, and water hydrogen exchange rate constants  $k_{\text{int}}$  can be calculated from the activation volumes of acid-catalyzed, base-catalyzed, and un-catalyzed HX reactions ( $\Delta V^\ddagger_{(\text{H}^+)} = +1.7$  mL/mol,  $\Delta V^\ddagger_{(\text{OH}^-)} = +11.0$  mL/mol,  $\Delta V^\ddagger_{(\text{H}_2\text{O})} = -9.0$  mL/mol) based on equation 1 and from pressure dependence of the ionization constant of water  $K_{\text{W}}$  (i.e.,  $\Delta V^\ddagger_{(\text{KW})} = -22.1$  mL/mol) based on equation 2 (4, 6). The ionization state of acidic side chains was estimated by using side chain -COOH  $\text{p}K_{\text{a}}$  of amino acid residues Glu and Asp correcting for temperature and pressure effect (4). The ionization state of basic side chain was estimated by using side chain imidazole  $\text{p}K_{\text{a}}$  of amino acid residue His correcting only for temperature effect, and as the  $\text{p}K_{\text{a}}$  of side chain of histidine is independent of pressure (7).

$$k(p) = k_0(p_0) \exp\left(-\frac{p - p_0}{RT} \Delta V^\ddagger\right) \quad (1)$$

$$pK_{\text{W}}(T, p) - pK_{\text{W}}(T, p_0) = \frac{p \Delta V^\ddagger}{2.303RT(1 + bp)} \quad (2)$$

The effect of pressure on the  $\text{p}K_{\text{a}}$  and pH\* of phosphate buffer was corrected (8). The predicted  $k_{\text{int}}$  values at 1 bar, 500 bar, 1000 bar, 1500 bar, 2000 bar and 2500 bar are given in Table S4. The results indicate that high pressure moderately reduces  $k_{\text{int}}$ .

**$^{15}\text{N}$  relaxation dispersion experiments.**  $^{15}\text{N}$ -Carr-Purcell-Meiboom-Gill (CPMG) NMR relaxation dispersion data were measured on a 1 mM  $^{15}\text{N}$  labeled L99A T4L sample at 25 °C under 6 different pressures (1 bar, 200 bar, 500 bar, 700 bar, 1000 bar, and 1500 bar) using AVANCE 500 MHz and 700 MHz spectrometers (Bruker BioSpin).  $^{15}\text{N}$  relaxation dispersion with a constant  $^{15}\text{N}$  relaxation period of 40

ms were obtained at different CPMG field strengths ( $v_{cpmg}=100$  Hz (2 times), 200 Hz (2 times), 300 Hz, 400 Hz, 600 Hz (2 times), 800 Hz (2 times), and 1000 Hz). Spectral analyses were performed using Topspin3.1 and Bruker dynamics center software.

**Analysis of pressure-dependent relaxation dispersion data.** As access to the excited state of L99A is a global two-site exchange process (9–11) all data were modelled using the Richard-Carver equation (12) given below. At first instance the chemical shift differences were fit individually for each residue (residues L7, K19, H31, E64, K65, M120, and S136), as seen in Table S5. As these values agreed well with those determined at ambient pressure, but also displayed some variation as a consequence of the lower sensitivity attainable with the pressure cell, the chemical shift difference was subsequently fitted to a single value for all pressures for each residue. Such group fitting has previously been shown to greatly improve obtaining stable solutions for the populations and exchange rates that are needed for accurate determination of thermodynamic and kinetic parameters (9).

To extract the exchange rate ( $k_{ex}$ ) and population of the excited state ( $p_E$ ) (Table S3) of L99A T4L at each pressure, we performed a global fit of the NMR relaxation dispersion data for residues L7, K19, H31, E64, K65, M120, and S136 at each pressure (Figs. S7-S12) to a two-site exchange model according to the Richard-Carver equation (12), the chemical shift differences between native state and excited state were kept constant for each residue during global fitting (10). Global fitting was performed with in-house written MATLAB scripts.

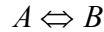

$$R_2^{eff} = R_2^0 + \frac{k_{ex}}{2} - v_{cpmg} \cosh^{-1} [D_+ \cosh(\eta_+) - D_- \cos(\eta_-)]$$

Where

$$D_{\pm} = \frac{1}{2} \left[ \pm 1 + \frac{\psi + 2\delta\omega^2}{(\psi^2 + \xi^2)^{0.5}} \right]$$

$$\eta_{\pm} = \frac{[\pm \psi + (\psi^2 + \xi^2)^{0.5}]^{0.5}}{2\sqrt{2}v_{cpmg}}$$

$$\psi = k_{ex}^2 - \delta\omega^2$$

$$\xi = -2\delta\omega(p_a k_{ex} - p_b k_{ex})$$

$v_{cpmg} = 1 / (4\tau)$  and  $2\tau$  is the time between the centers of two successive  $180^\circ$  pulses. Equal intrinsic transverse relaxation rates in the ground and excited states were assumed.

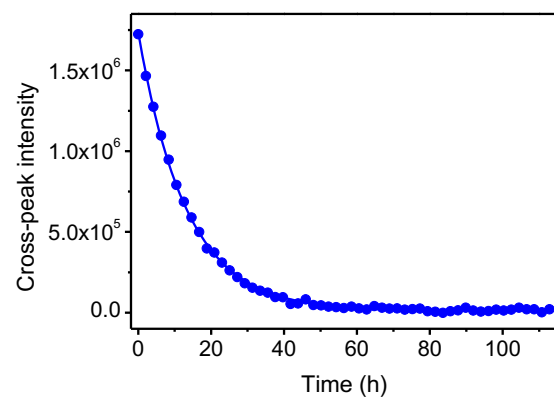

**Fig. S1.** Typical proton–deuterium exchange curve. Data shown is for the backbone amide hydrogen of Lys16 at 2000 bar.

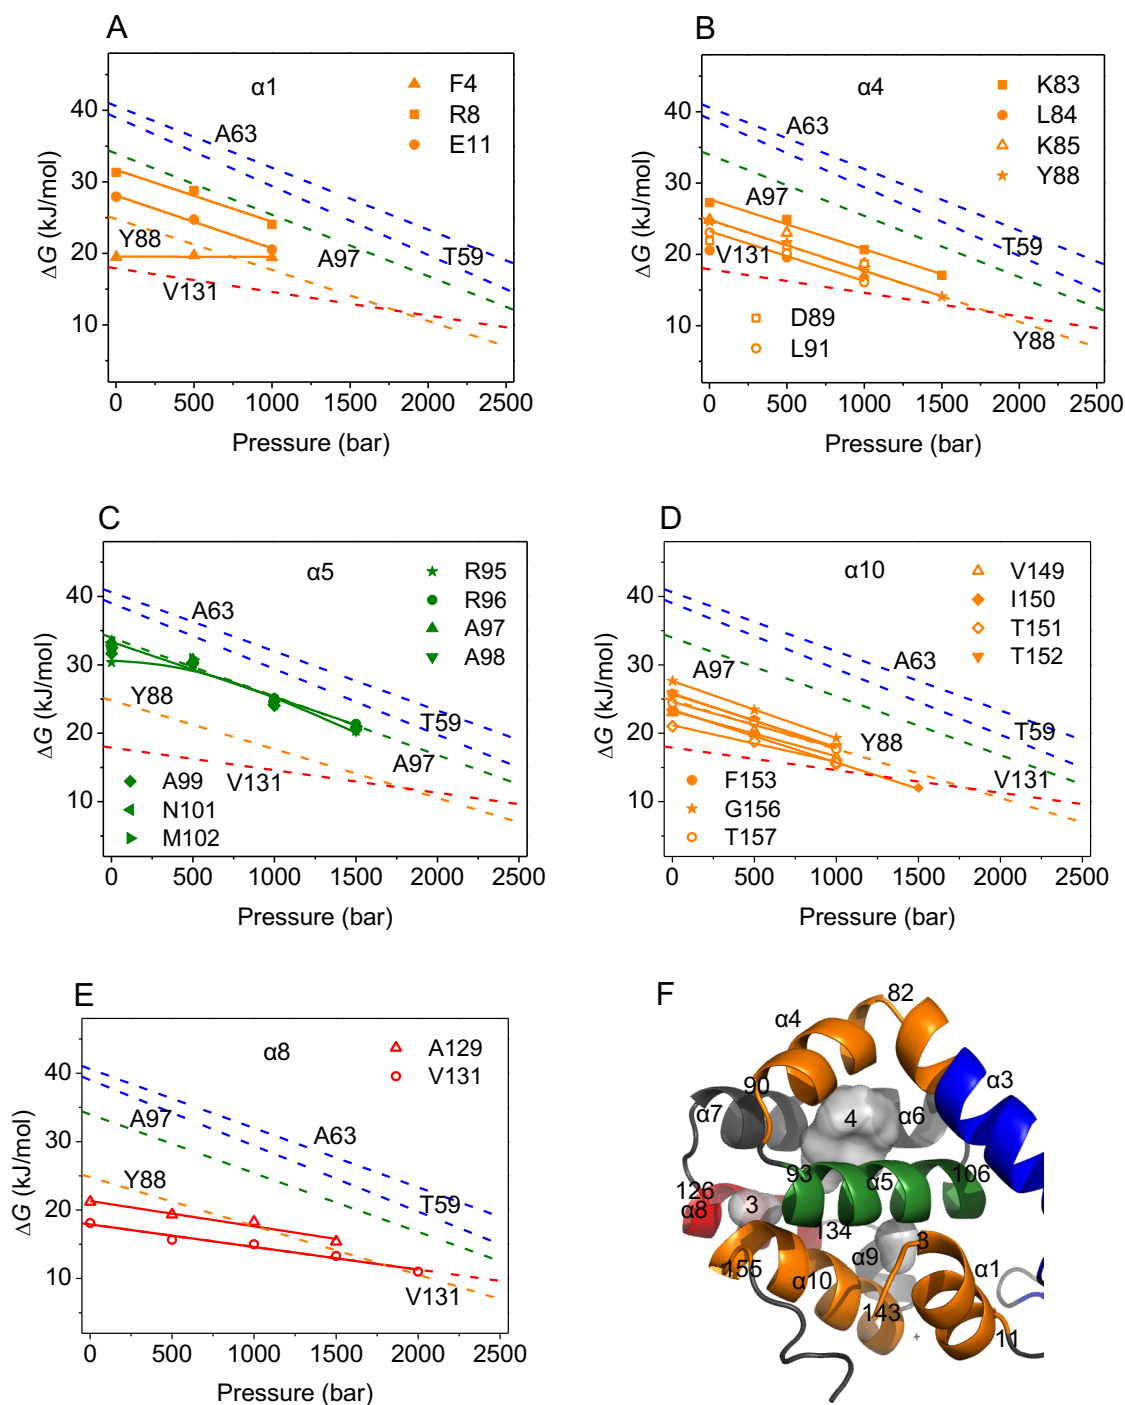

**Fig. S2.** Native-state HX isotherms for residues in selected helices in the CTD of L99A T4L. Pressure-dependent stabilities for residues in (A)  $\alpha$ -helix 1, (B)  $\alpha$ -helix 4, (C)  $\alpha$ -helix 5, (D)  $\alpha$ -helix 10, and (E)  $\alpha$ -helix 8. Symbols indicate experimentally determined stabilities, and lines are fits to Equation (1) and (2); (F) Positions of the amide hydrogens detected in panels A–C illustrated on the crystal structure of L99A T4L. Cavities 3 and 4 are shown as grey space-filling models.

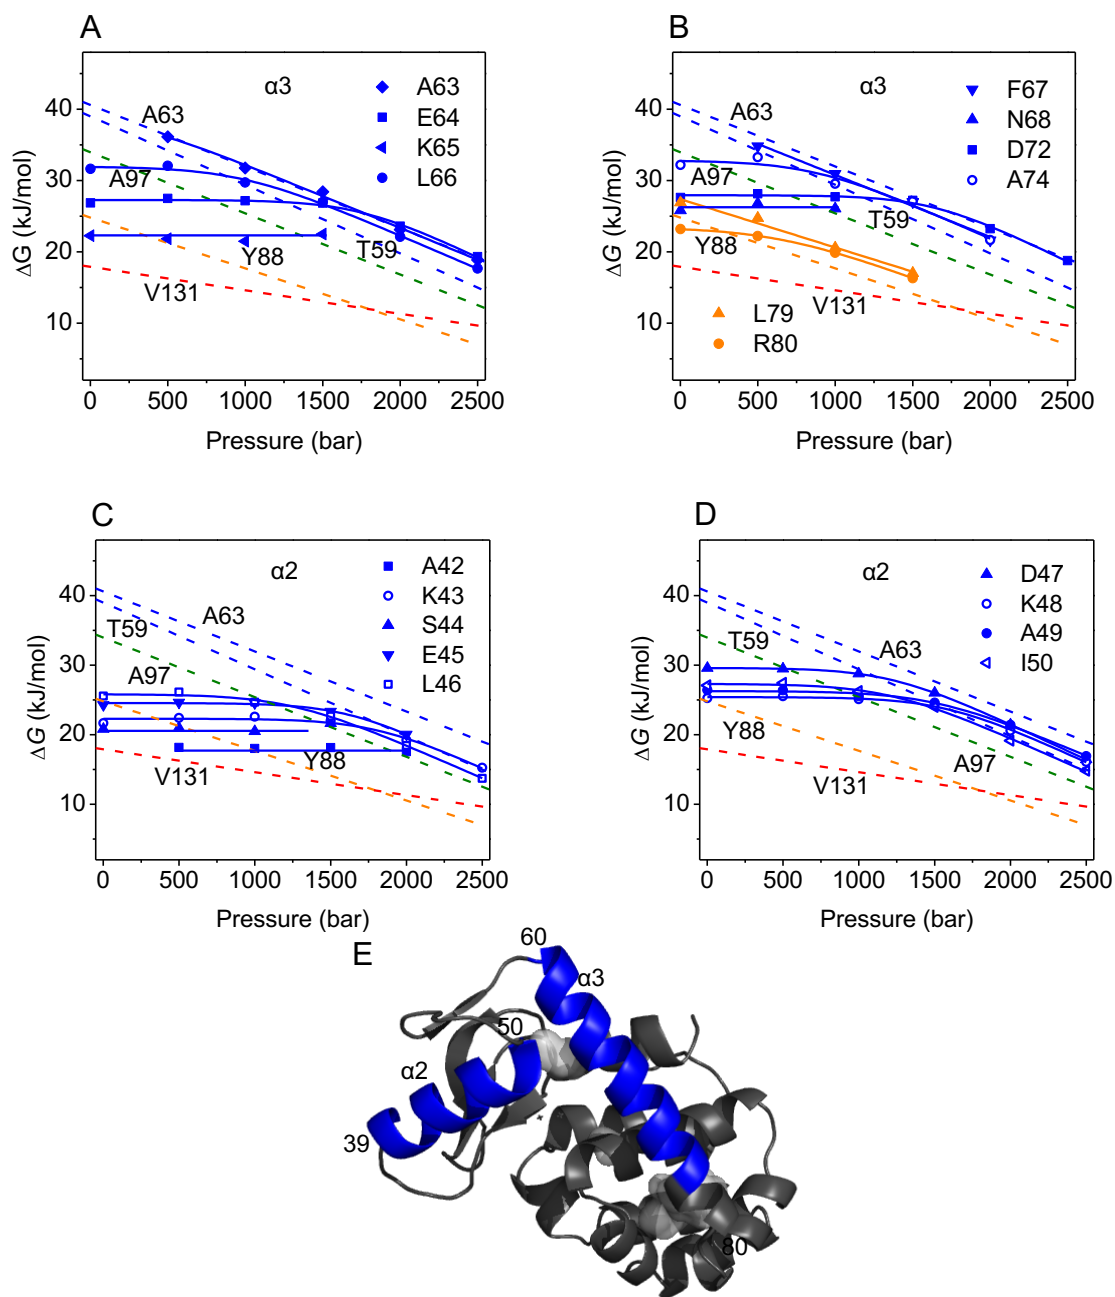

**Fig. S3.** Native-state HX isotherms for residues in helices of the NTD of L99A T4L. Pressure-dependent stabilities for residues in (A) and (B)  $\alpha$ -helix 3, (C) and (D)  $\alpha$ -helix 2. Symbols indicate experimentally determined stabilities, and lines are fits to Equations (1) and (2). (E) Positions of the amide hydrogens detected in panels A–D illustrated on the crystal structure of L99A T4L. Leu79 and Arg80 at the C terminus of  $\alpha$ -helix 3 are categorized as part of the CTD.

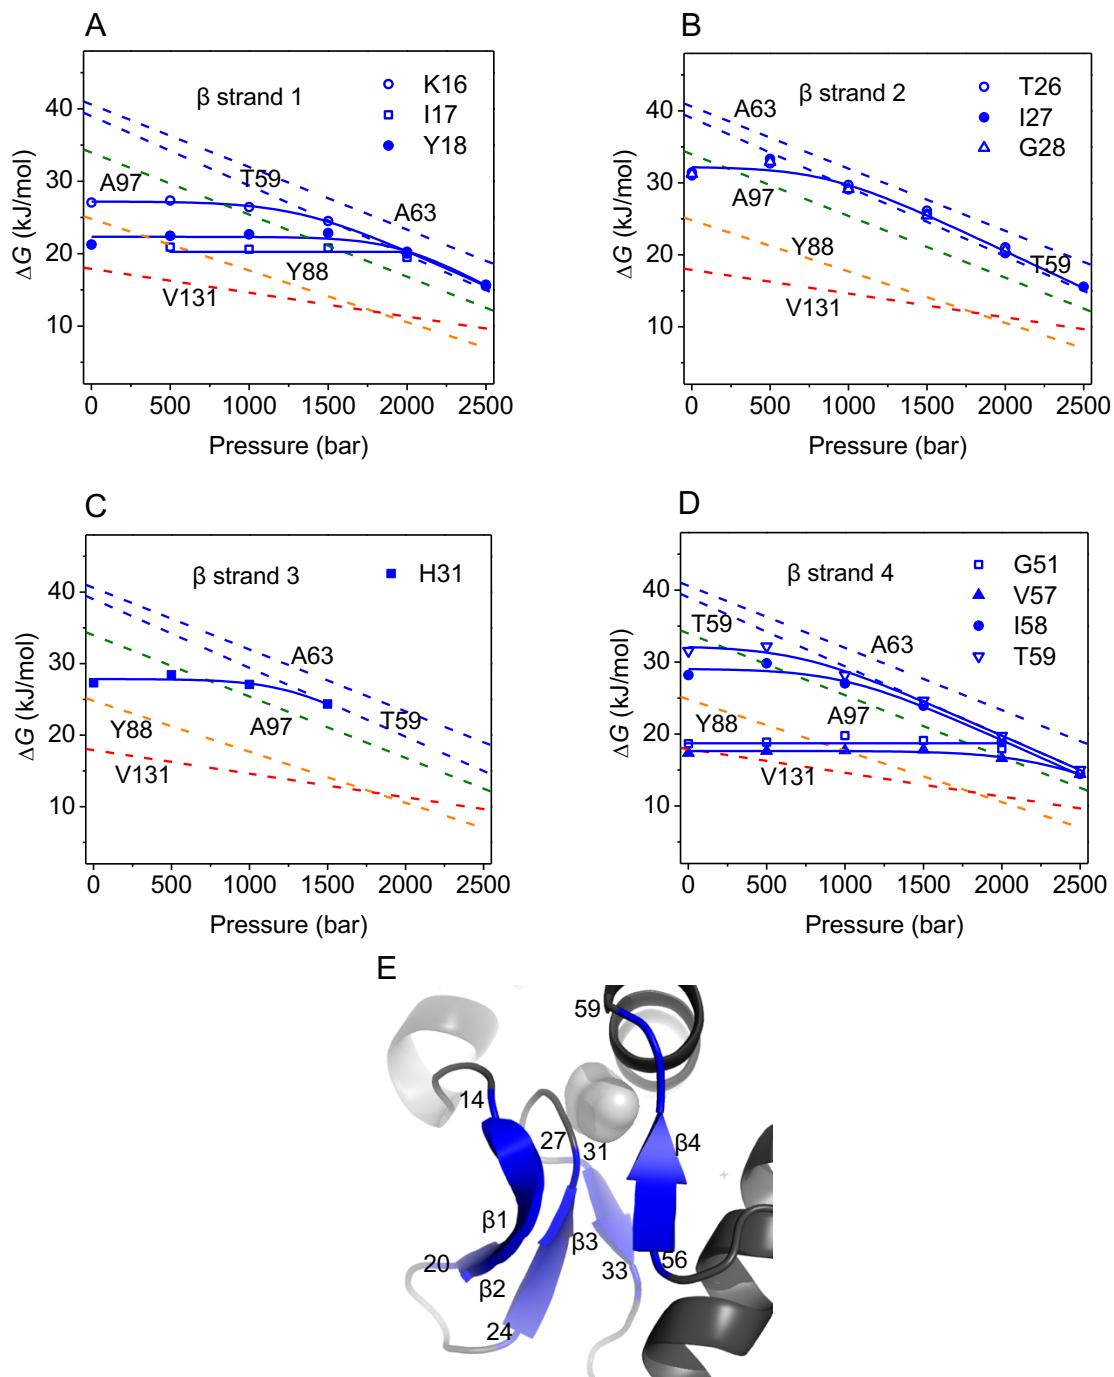

**Fig. S4.** Native-state HX isotherms for residues in  $\beta$  strands in the NTD of L99A T4L. Symbols indicate experimentally determined stabilities (A–D), and lines are fits to Equations (1) and (2). (E) Positions of the amide hydrogens detected in panels A–D illustrated on the crystal structure of L99A T4L.

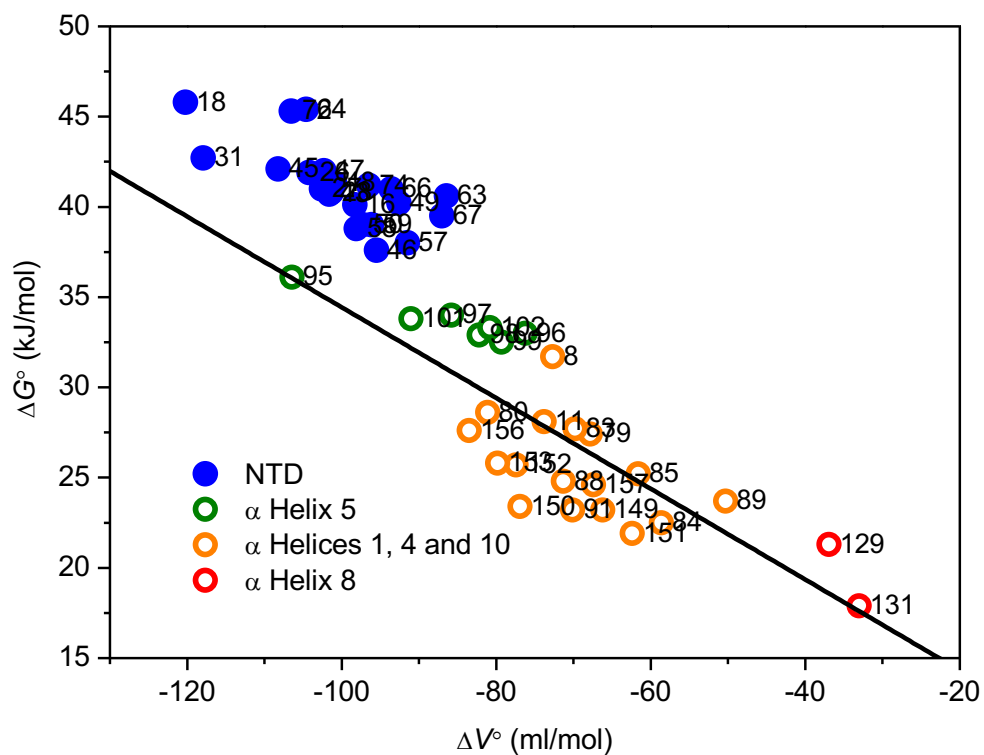

**Fig. S5.** Correlation of residue-specific  $\Delta G^\circ$  and  $\Delta V^\circ$  defines a broad of stabilities from which the cost of cavity formation can be determined. Data for the NTD (blue) lies on a parallel line, also reporting on the cost of cavity formation in the CTD, but appears offset by 5 kJ/mol, in agreement with the greater stability of the NTD for L99A.



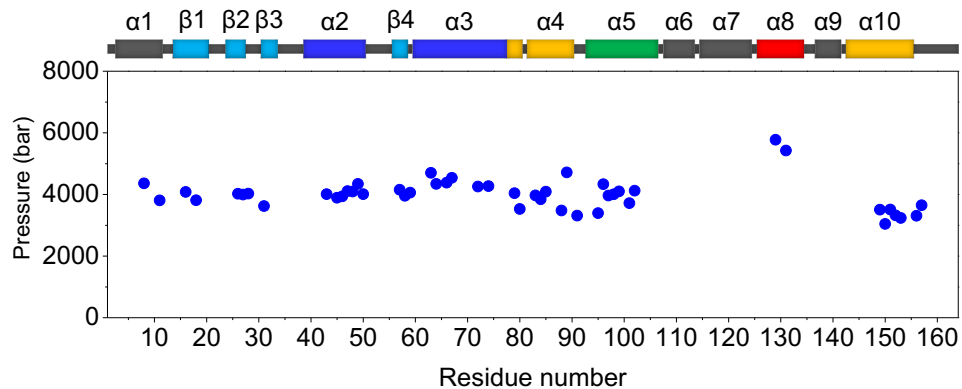

**Fig. S6.** Unfolding mid-point pressure  $p$  (at  $\Delta G=0$ ) of L99A T4L based on pressure dependent hydrogen exchange experiments. For A129 and V131, small values for  $\Delta G^\circ$  and  $\Delta V^\circ$  precluded the observation of the merging to global unfolding isotherms at high pressure (see Fig. 2C), causing their extrapolation to be unreliable.

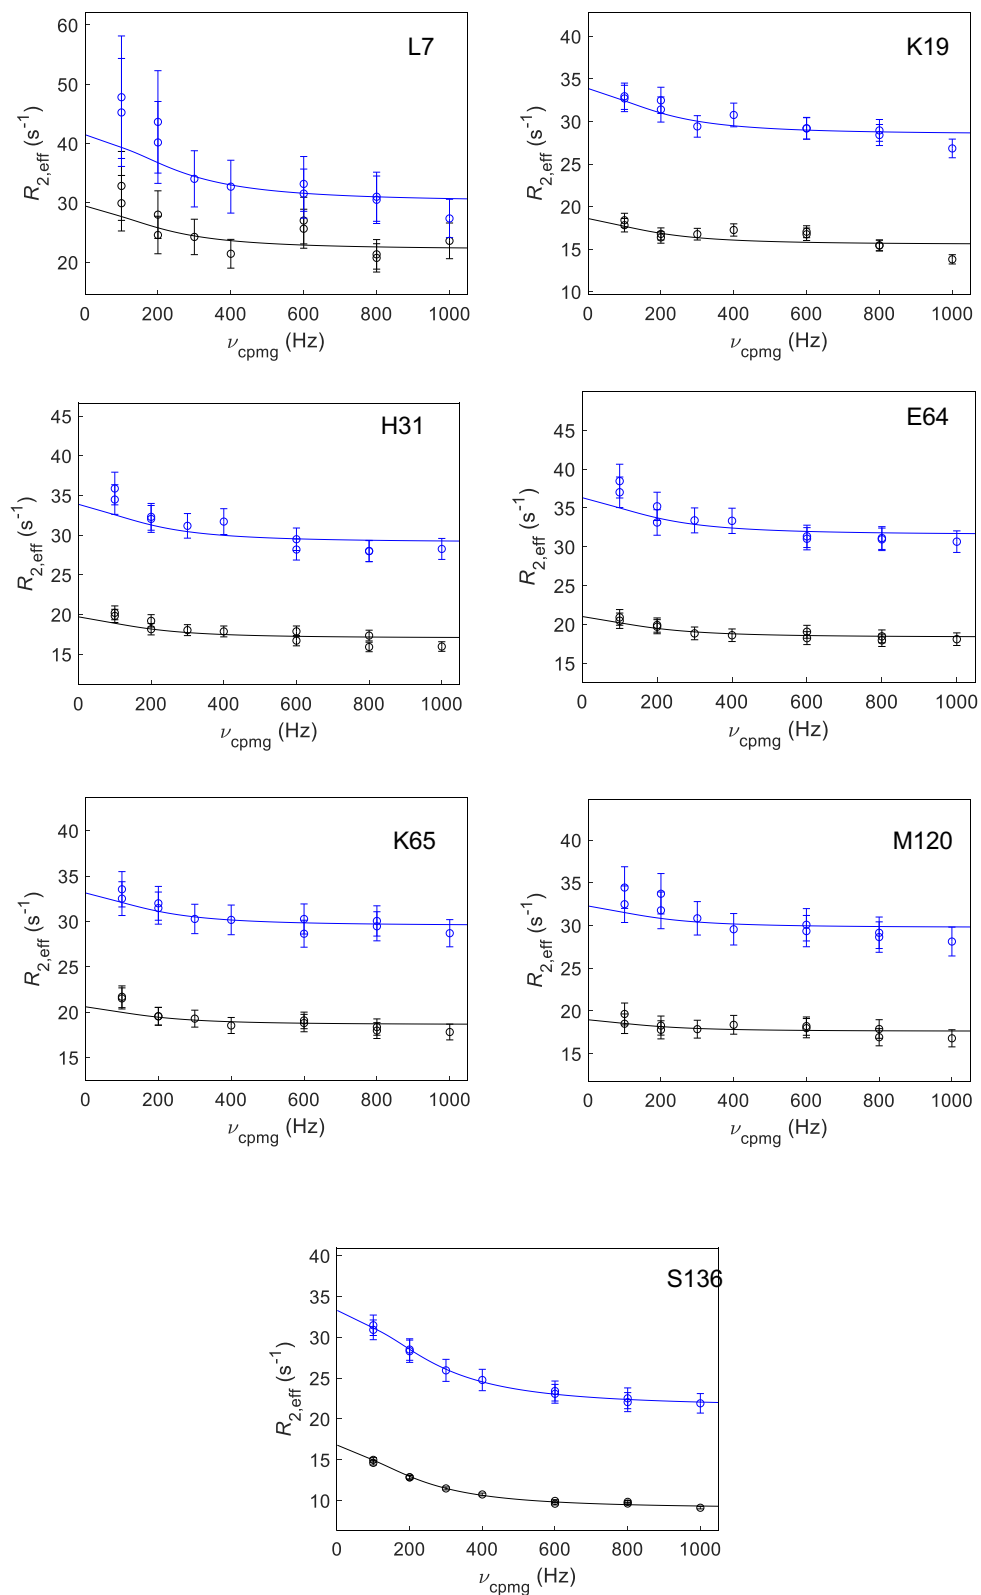

**Fig. S7.**  $^{15}\text{N}$  CPMG relaxation dispersion profiles recorded at 1 bar with 500 MHz (black) and 700 MHz (blue) spectrometers for the selected residues of L99A T4L.

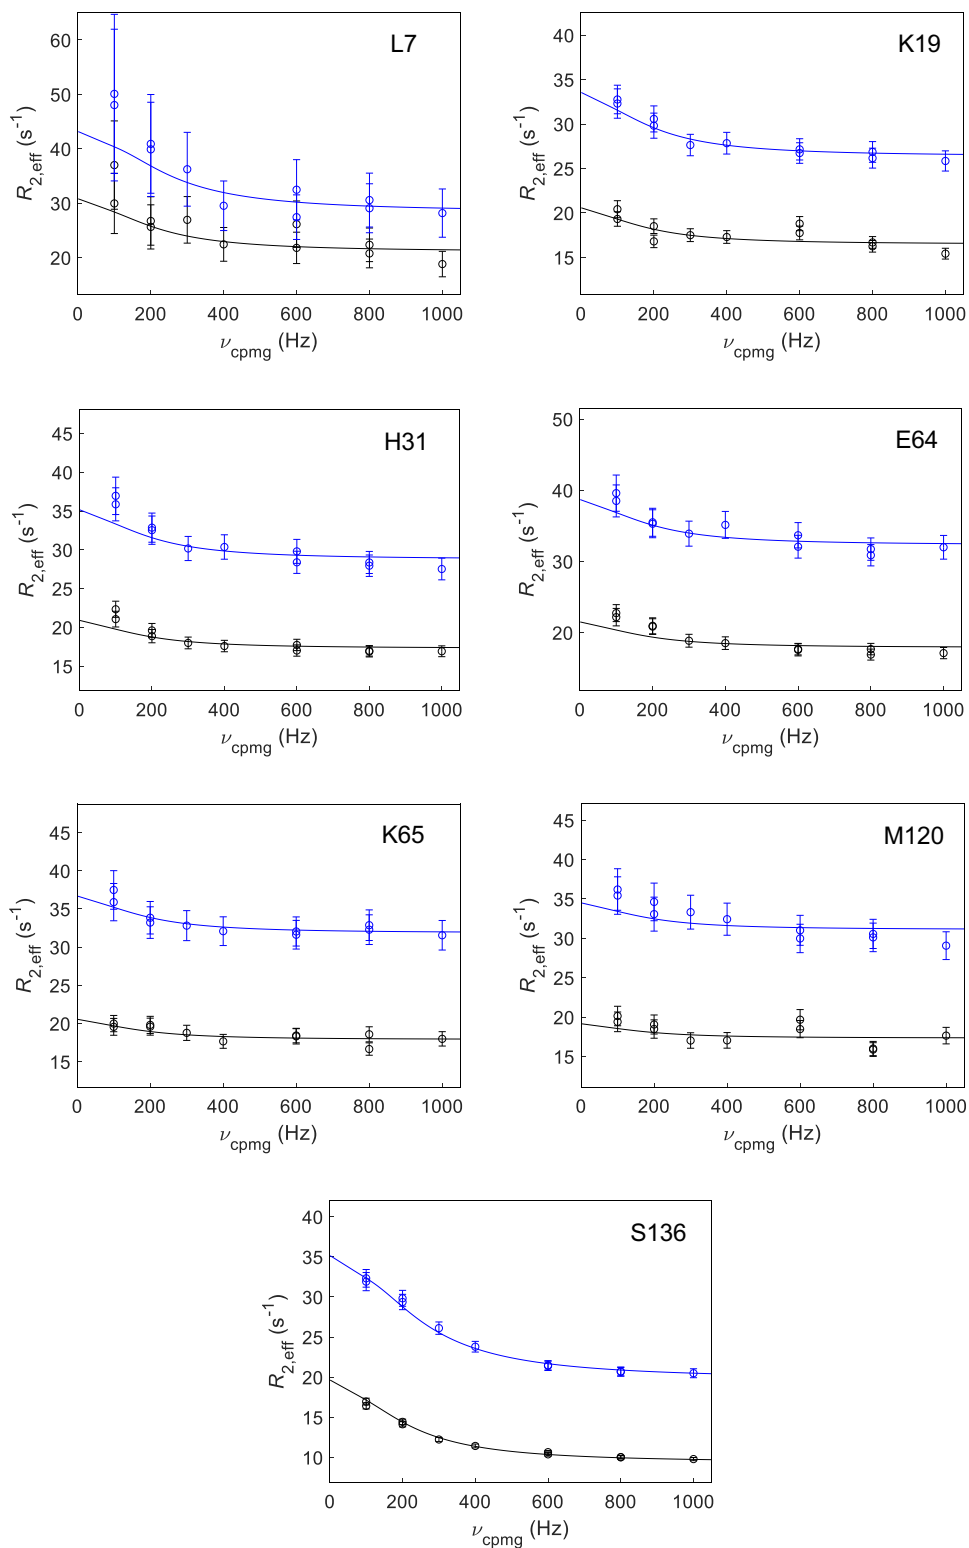

**Fig. S8.**  $^{15}\text{N}$  CPMG relaxation dispersion profiles recorded at 200 bar with 500 MHz (black) and 700 MHz (blue) spectrometers for the selected residues of L99A T4L.

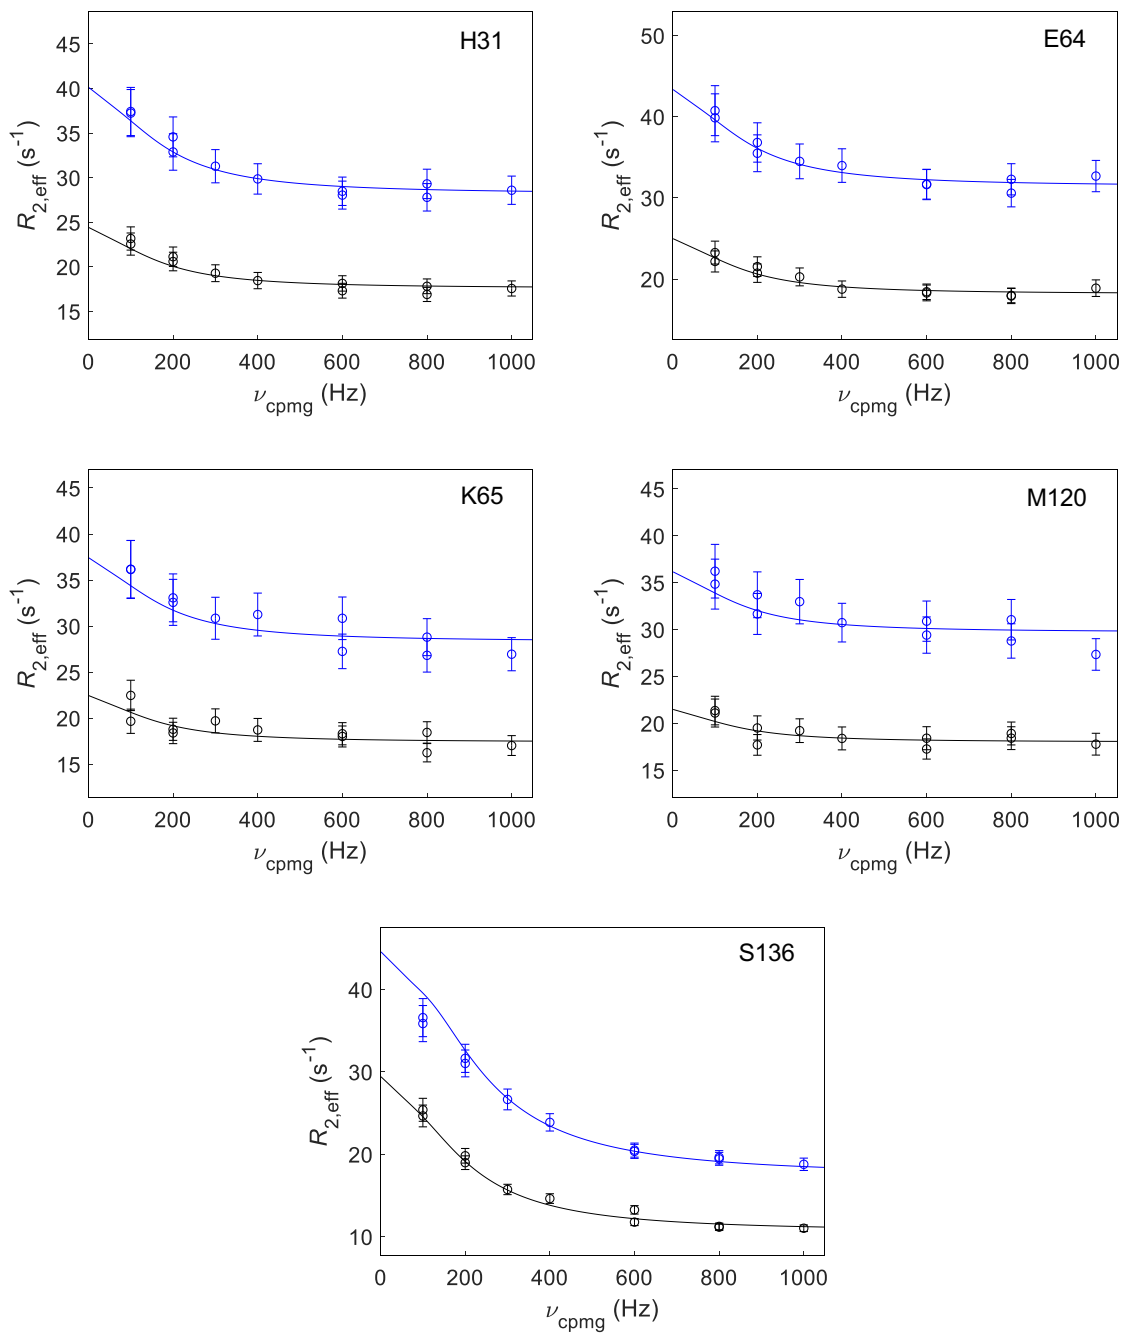

**Fig. S9.**  $^{15}\text{N}$  CPMG relaxation dispersion profiles recorded at 500 bar with 500 MHz (black) and 700 MHz (blue) spectrometers for the selected residues of L99A T4L.

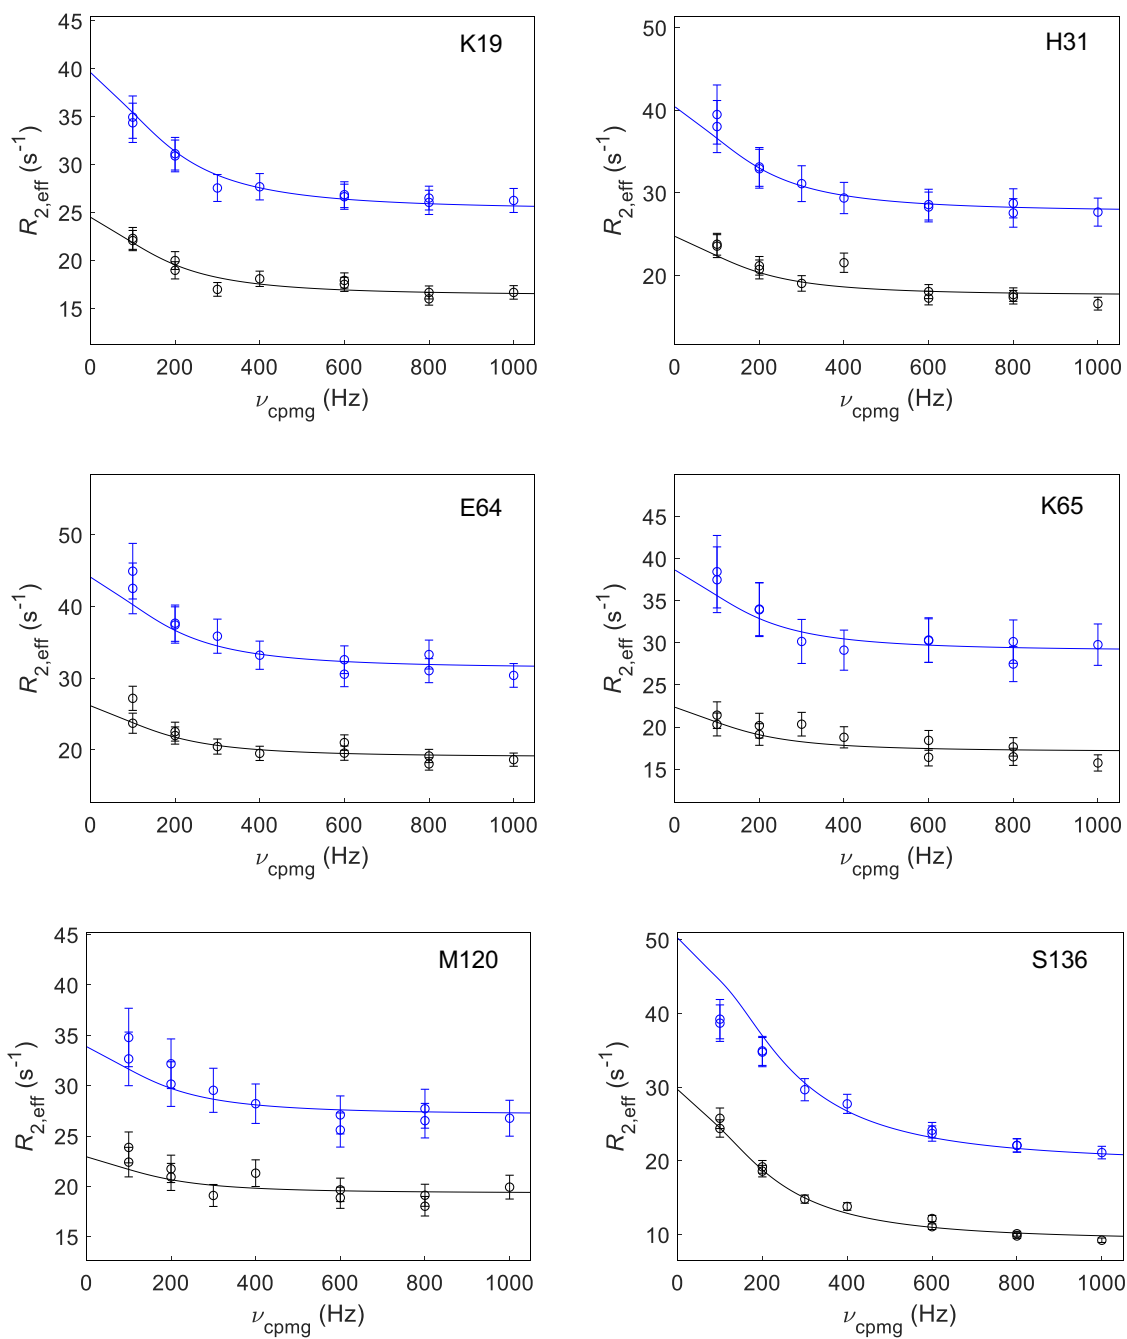

**Fig. S10.**  $^{15}\text{N}$  CPMG relaxation dispersion profiles recorded at 700 bar with 500 MHz (black) and 700 MHz (blue) spectrometers for the selected residues of L99A T4L.

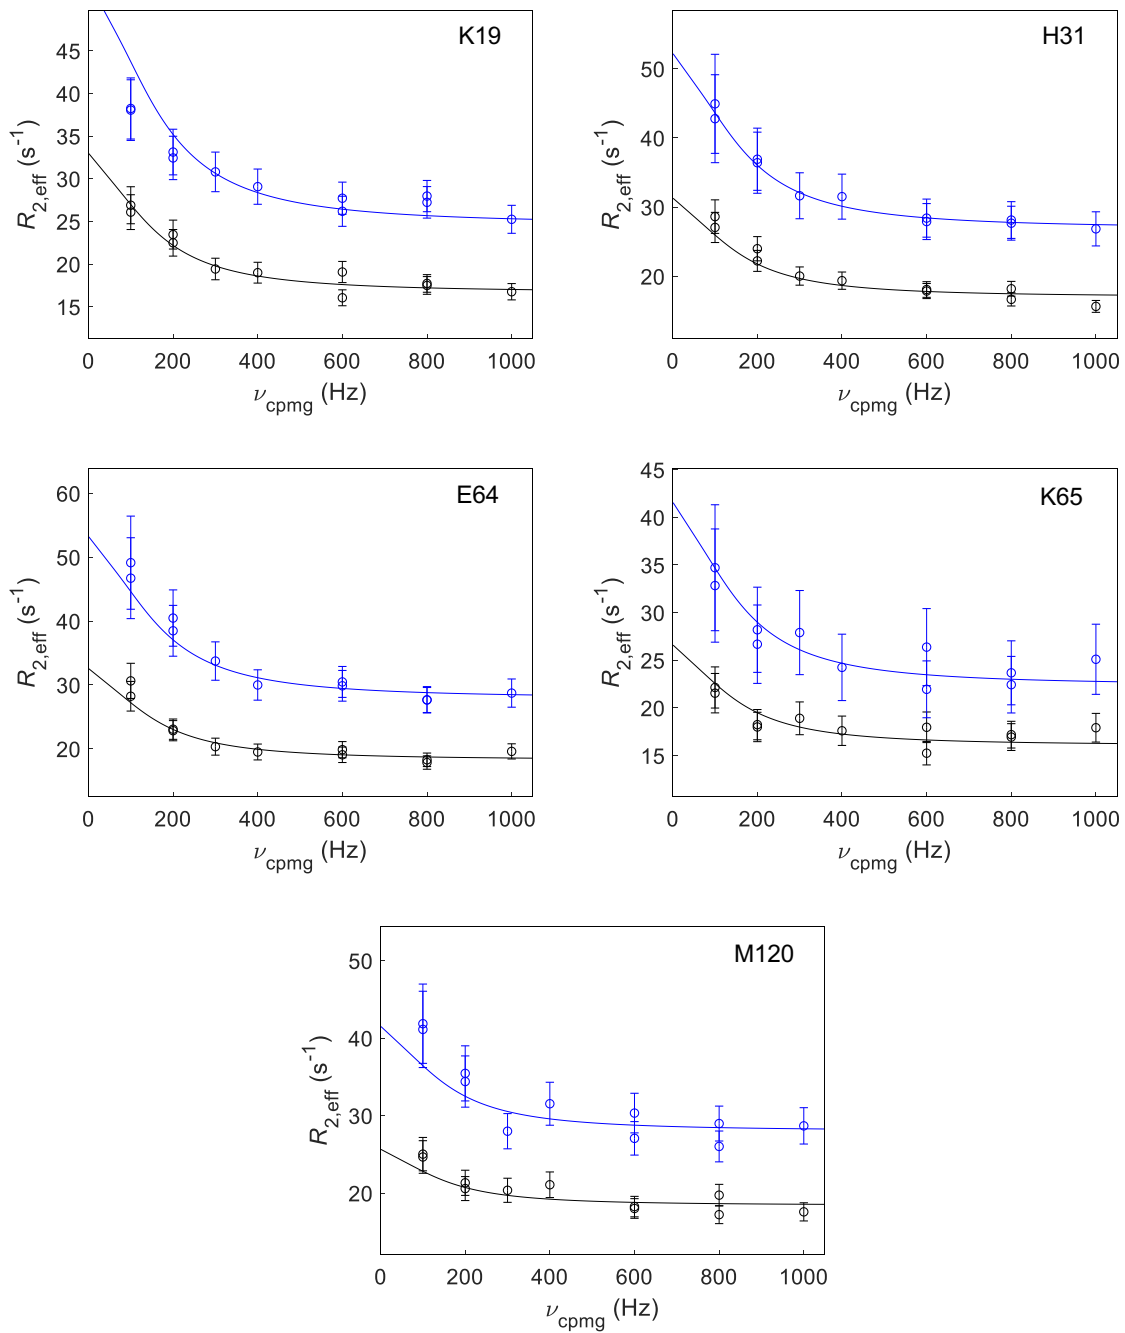

**Fig. S11.**  $^{15}\text{N}$  CPMG relaxation dispersion profiles recorded at 1000 bar with 500 MHz (black) and 700 MHz (blue) spectrometers for the selected residues of L99A T4L.

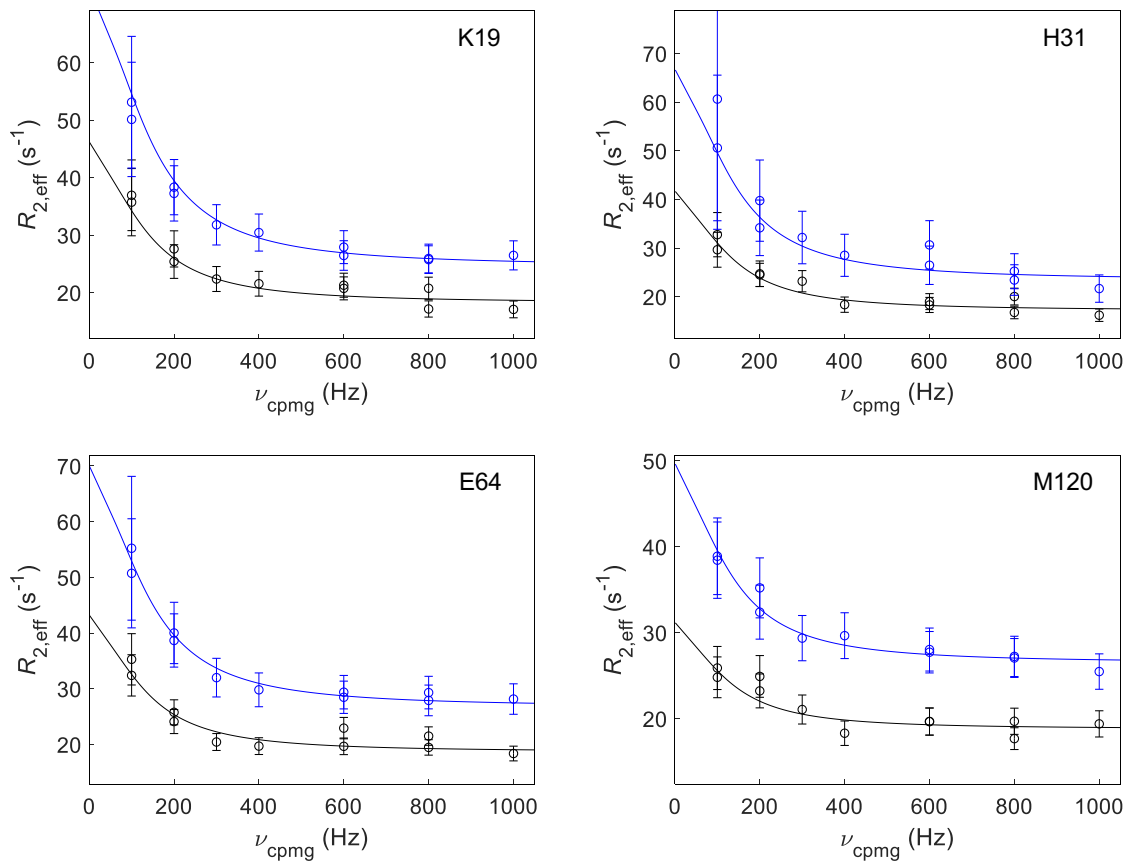

**Fig. S12.**  $^{15}\text{N}$  CPMG relaxation dispersion profiles recorded at 1500 bar with 500 MHz (black) and 700 MHz (blue) spectrometers for the selected residues of L99A T4L.

**Table S1.** Calculated  $\Delta V^\circ$  and  $\Delta G^\circ$  for structural elements in L99A T4L.

| Element                             | $\Delta G^\circ$ (kJ/mol) | $\Delta V^\circ$ (ml/mol) |
|-------------------------------------|---------------------------|---------------------------|
| $\alpha 1$ (4 – 11)                 | 30 $\pm$ 3                | -73 $\pm$ 1               |
| $\alpha 2$ (42 – 50)                | 40 $\pm$ 2                | -100 $\pm$ 5              |
| $\beta$ strands (16 – 33 / 51 – 59) | 41 $\pm$ 2                | -103 $\pm$ 10             |
| $\alpha 3$ (63 – 74)                | 42 $\pm$ 3                | -96 $\pm$ 9               |
| $\alpha 4$ (79–80, 83 – 91)         | 25 $\pm$ 2                | -66 $\pm$ 9               |
| $\alpha 5$ (95 – 102)               | 34 $\pm$ 1                | -86 $\pm$ 10              |
| $\alpha 8$ (129 – 131)              | 20 $\pm$ 2                | -35 $\pm$ 3               |
| $\alpha 10$ (149 – 157)             | 25 $\pm$ 2                | -73 $\pm$ 8               |



**Table S2.** Calculated  $\Delta G^\circ$  and  $\Delta V^\circ$  for amino-acid residues in L99A T4L.

| Residue | $\Delta G^\circ$ (kJ/mol) | $\Delta V^\circ$<br>(ml/mol) | No.<br>pressures<br>used in fit | Model                     |
|---------|---------------------------|------------------------------|---------------------------------|---------------------------|
| R8      | 31.7                      | -72.7                        | 3                               | 2-parameters              |
| E11     | 28.1                      | -73.8                        | 3                               | 2-parameters              |
| K16     | 40.1                      | -98.3                        | 6                               | 3-parameters              |
| Y18     | 45.8                      | -120.2                       | 6                               | 3-parameters              |
| T26     | 41.9                      | -104.2                       | 5                               | 3-parameters              |
| I27     | 41                        | -102.6                       | 6                               | 3-parameters              |
| G28     | 40.8                      | -101.3                       | 5                               | 3-parameters              |
| H31     | 42.7                      | -117.9                       | 4                               | 3-parameters              |
| K43     | 40.7                      | -101.6                       | 6                               | 3-parameters              |
| E45     | 42.1                      | -108.2                       | 6                               | 3-parameters              |
| L46     | 37.6                      | -95.5                        | 6                               | 3-parameters              |
| D47     | 42                        | -102.3                       | 6                               | 3-parameters              |
| K48     | 41.3                      | -100.9                       | 6                               | 3-parameters              |
| A49     | 40.2                      | -92.6                        | 6                               | 3-parameters              |
| I50     | 39                        | -97.3                        | 6                               | 3-parameters              |
| V57     | 38                        | -91.5                        | 6                               | 3-parameters              |
| I58     | 38.8                      | -98.1                        | 6                               | 3-parameters              |
| T59     | 39                        | -96.1                        | 6                               | 3-parameters              |
| A63     | 40.6                      | -86.4                        | 5                               | 2-parameters              |
| E64     | 45.4                      | -104.6                       | 6                               | 3-parameters              |
| L66     | 41                        | -93.6                        | 6                               | 3-parameters              |
| F67     | 39.5                      | -87                          | 4                               | 2-parameters              |
| D72     | 45.3                      | -106.5                       | 6                               | 3-parameters              |
| A74     | 41.2                      | -96.5                        | 5                               | 3-parameters              |
| L79     | 27.4                      | -67.8                        | 5                               | 2-parameters              |
| R80     | 28.6                      | -81.1                        | 4                               | 3-parameters              |
| K83     | 27.7                      | -69.8                        | 4                               | 2-parameters              |
| L84     | 22.5                      | -58.6                        | 3                               | 2-parameters <sup>a</sup> |
| K85     | 25.2                      | -61.6                        | 3                               | 2-parameters              |
| Y88     | 24.8                      | -71.3                        | 4                               | 2-parameters              |
| D89     | 23.7                      | -50.3                        | 3                               | 2-parameters <sup>a</sup> |
| L91     | 23.2                      | -70.1                        | 3                               | 2-parameters              |
| R95     | 36.1                      | -106.4                       | 4                               | 3-parameters              |
| R96     | 33                        | -76.2                        | 4                               | 2-parameters              |
| A97     | 34                        | -85.8                        | 4                               | 2-parameters              |
| A98     | 32.9                      | -82.2                        | 4                               | 2-parameters              |

|      |      |       |   |                           |
|------|------|-------|---|---------------------------|
| A99  | 32.5 | -79.3 | 4 | 2-parameters              |
| N101 | 33.8 | -91   | 3 | 2-parameters              |
| M102 | 33.3 | -80.8 | 4 | 2-parameters              |
| A129 | 21.3 | -36.9 | 4 | 2-parameters              |
| V131 | 17.9 | -33   | 5 | 2-parameters              |
| V149 | 23.2 | -66.2 | 3 | 2-parameters              |
| I150 | 23.4 | -76.9 | 4 | 2-parameters              |
| T151 | 21.9 | -62.4 | 3 | 2-parameters <sup>a</sup> |
| T152 | 25.7 | -77.4 | 3 | 2-parameters              |
| F153 | 25.8 | -79.8 | 3 | 2-parameters              |
| G156 | 27.6 | -83.5 | 3 | 2-parameters              |
| T157 | 24.6 | -67.4 | 3 | 2-parameters              |

---

<sup>a</sup> Analyzed using data points at 500 and 1000 bar only.

**Table S3.** Values obtained from the global fit of NMR dispersion measurement for L99A T4L at 1 bar, 200 bar, 500 bar, 700 bar, 1000 bar, and 1500 bar.  $p_E$  is the population of excited state.

| Pressure (bar) | $k_{ex}$ ( $s^{-1}$ ) | $p_E$ (%) |
|----------------|-----------------------|-----------|
| 1              | 1190±129              | 2.1±0.1   |
| 200            | 1129±114              | 2.7±0.1   |
| 500            | 993±138               | 4.8±0.2   |
| 700            | 1093±139              | 5.4±0.2   |
| 1000           | 938±187               | 10.1±0.8  |
| 1500           | 808±174               | 16.0±1.5  |

**Table S4.** Predicted  $k_{\text{int}}$  for amino-acid residues of unstructured peptide of L99A T4L in pH\* 5.5 phosphate buffer at 24 °C under 1 bar, 500 bar, 1000 bar, 1500 bar, 2000 bar, and 2500 bar.

| Residue number | $k_{\text{int}}$ at 1 bar ( $\text{s}^{-1}$ ) | $k_{\text{int}}$ at 500 bar ( $\text{s}^{-1}$ ) | $k_{\text{int}}$ at 1000 bar ( $\text{s}^{-1}$ ) | $k_{\text{int}}$ at 1500 bar ( $\text{s}^{-1}$ ) | $k_{\text{int}}$ at 2000 bar ( $\text{s}^{-1}$ ) | $k_{\text{int}}$ at 2500 bar ( $\text{s}^{-1}$ ) |
|----------------|-----------------------------------------------|-------------------------------------------------|--------------------------------------------------|--------------------------------------------------|--------------------------------------------------|--------------------------------------------------|
| N2             | 31.5                                          | 29.5                                            | 27.3                                             | 25.1                                             | 22.7                                             | 20.5                                             |
| I3             | 0.074                                         | 0.069                                           | 0.064                                            | 0.059                                            | 0.053                                            | 0.048                                            |
| F4             | 0.065                                         | 0.061                                           | 0.056                                            | 0.052                                            | 0.047                                            | 0.042                                            |
| E5             | 0.188                                         | 0.177                                           | 0.165                                            | 0.152                                            | 0.138                                            | 0.125                                            |
| M6             | 0.159                                         | 0.151                                           | 0.141                                            | 0.13                                             | 0.119                                            | 0.108                                            |
| L7             | 0.065                                         | 0.061                                           | 0.056                                            | 0.052                                            | 0.047                                            | 0.042                                            |
| R8             | 0.139                                         | 0.131                                           | 0.121                                            | 0.111                                            | 0.101                                            | 0.091                                            |
| I9             | 0.059                                         | 0.055                                           | 0.051                                            | 0.047                                            | 0.042                                            | 0.038                                            |
| D10            | 0.154                                         | 0.145                                           | 0.135                                            | 0.124                                            | 0.113                                            | 0.102                                            |
| E11            | 0.125                                         | 0.119                                           | 0.111                                            | 0.103                                            | 0.094                                            | 0.086                                            |
| G12            | 0.301                                         | 0.285                                           | 0.266                                            | 0.246                                            | 0.224                                            | 0.204                                            |
| L13            | 0.074                                         | 0.07                                            | 0.065                                            | 0.059                                            | 0.054                                            | 0.049                                            |
| R14            | 0.139                                         | 0.131                                           | 0.121                                            | 0.111                                            | 0.101                                            | 0.091                                            |
| L15            | 0.083                                         | 0.078                                           | 0.072                                            | 0.067                                            | 0.06                                             | 0.055                                            |
| K16            | 0.107                                         | 0.1                                             | 0.093                                            | 0.085                                            | 0.077                                            | 0.07                                             |
| I17            | 0.047                                         | 0.044                                           | 0.04                                             | 0.037                                            | 0.034                                            | 0.03                                             |
| Y18            | 0.06                                          | 0.056                                           | 0.052                                            | 0.048                                            | 0.043                                            | 0.039                                            |
| K19            | 0.194                                         | 0.182                                           | 0.168                                            | 0.155                                            | 0.14                                             | 0.127                                            |
| D20            | 0.344                                         | 0.324                                           | 0.302                                            | 0.278                                            | 0.253                                            | 0.229                                            |
| T21            | 0.125                                         | 0.118                                           | 0.11                                             | 0.102                                            | 0.093                                            | 0.084                                            |
| E22            | 0.258                                         | 0.243                                           | 0.226                                            | 0.209                                            | 0.19                                             | 0.172                                            |
| G23            | 0.301                                         | 0.285                                           | 0.266                                            | 0.246                                            | 0.224                                            | 0.204                                            |
| Y24            | 0.151                                         | 0.141                                           | 0.131                                            | 0.12                                             | 0.109                                            | 0.098                                            |
| Y25            | 0.114                                         | 0.107                                           | 0.099                                            | 0.091                                            | 0.082                                            | 0.075                                            |
| T26            | 0.183                                         | 0.171                                           | 0.159                                            | 0.146                                            | 0.132                                            | 0.119                                            |
| I27            | 0.056                                         | 0.052                                           | 0.049                                            | 0.045                                            | 0.04                                             | 0.037                                            |
| G28            | 0.206                                         | 0.194                                           | 0.179                                            | 0.165                                            | 0.149                                            | 0.135                                            |
| I29            | 0.052                                         | 0.049                                           | 0.045                                            | 0.042                                            | 0.038                                            | 0.034                                            |
| G30            | 0.206                                         | 0.194                                           | 0.179                                            | 0.165                                            | 0.149                                            | 0.135                                            |
| H31            | 1.665                                         | 1.565                                           | 1.454                                            | 1.341                                            | 1.214                                            | 1.1                                              |
| L32            | 0.322                                         | 0.302                                           | 0.281                                            | 0.259                                            | 0.234                                            | 0.212                                            |
| L33            | 0.031                                         | 0.029                                           | 0.027                                            | 0.025                                            | 0.022                                            | 0.02                                             |
| T34            | 0.1                                           | 0.094                                           | 0.087                                            | 0.08                                             | 0.072                                            | 0.066                                            |
| K35            | 0.274                                         | 0.257                                           | 0.238                                            | 0.219                                            | 0.198                                            | 0.179                                            |

|     |       |       |       |       |       |       |
|-----|-------|-------|-------|-------|-------|-------|
| S36 | 0.586 | 0.549 | 0.509 | 0.468 | 0.423 | 0.383 |
| P37 |       |       |       |       |       |       |
| S38 | 0.256 | 0.24  | 0.222 | 0.204 | 0.185 | 0.167 |
| L39 | 0.1   | 0.094 | 0.087 | 0.08  | 0.072 | 0.065 |
| N40 | 0.361 | 0.339 | 0.314 | 0.289 | 0.261 | 0.236 |
| A41 | 0.396 | 0.371 | 0.344 | 0.317 | 0.286 | 0.259 |
| A42 | 0.19  | 0.178 | 0.165 | 0.152 | 0.137 | 0.124 |
| K43 | 0.173 | 0.162 | 0.15  | 0.138 | 0.125 | 0.113 |
| S44 | 0.586 | 0.549 | 0.509 | 0.468 | 0.423 | 0.383 |
| E45 | 0.325 | 0.306 | 0.284 | 0.263 | 0.238 | 0.216 |
| L46 | 0.043 | 0.041 | 0.038 | 0.035 | 0.032 | 0.029 |
| D47 | 0.161 | 0.152 | 0.141 | 0.13  | 0.118 | 0.107 |
| K48 | 0.133 | 0.126 | 0.117 | 0.108 | 0.099 | 0.09  |
| A49 | 0.25  | 0.234 | 0.217 | 0.2   | 0.18  | 0.163 |
| I50 | 0.035 | 0.033 | 0.031 | 0.028 | 0.025 | 0.023 |
| G51 | 0.206 | 0.194 | 0.179 | 0.165 | 0.149 | 0.135 |
| R52 | 0.334 | 0.314 | 0.29  | 0.267 | 0.242 | 0.219 |
| N53 | 0.972 | 0.911 | 0.844 | 0.777 | 0.702 | 0.635 |
| T54 | 0.34  | 0.319 | 0.295 | 0.272 | 0.246 | 0.222 |
| N55 | 0.928 | 0.87  | 0.806 | 0.742 | 0.67  | 0.606 |
| G56 | 0.733 | 0.687 | 0.636 | 0.586 | 0.529 | 0.479 |
| V57 | 0.056 | 0.052 | 0.048 | 0.045 | 0.04  | 0.036 |
| I58 | 0.026 | 0.024 | 0.022 | 0.02  | 0.018 | 0.017 |
| T59 | 0.096 | 0.09  | 0.083 | 0.077 | 0.069 | 0.063 |
| K60 | 0.274 | 0.257 | 0.238 | 0.219 | 0.198 | 0.179 |
| D61 | 0.344 | 0.324 | 0.302 | 0.278 | 0.253 | 0.229 |
| E62 | 0.125 | 0.119 | 0.111 | 0.103 | 0.094 | 0.086 |
| A63 | 0.163 | 0.154 | 0.144 | 0.133 | 0.121 | 0.11  |
| E64 | 0.163 | 0.153 | 0.143 | 0.132 | 0.12  | 0.108 |
| K65 | 0.148 | 0.14  | 0.131 | 0.121 | 0.11  | 0.1   |
| L66 | 0.066 | 0.062 | 0.058 | 0.053 | 0.048 | 0.043 |
| F67 | 0.068 | 0.064 | 0.059 | 0.054 | 0.049 | 0.044 |
| N68 | 0.677 | 0.635 | 0.588 | 0.541 | 0.489 | 0.442 |
| Q69 | 0.455 | 0.426 | 0.395 | 0.363 | 0.328 | 0.297 |
| D70 | 0.414 | 0.39  | 0.363 | 0.335 | 0.304 | 0.276 |
| V71 | 0.029 | 0.027 | 0.026 | 0.024 | 0.021 | 0.02  |
| D72 | 0.189 | 0.178 | 0.166 | 0.153 | 0.139 | 0.126 |
| A73 | 0.146 | 0.138 | 0.128 | 0.119 | 0.108 | 0.098 |
| A74 | 0.19  | 0.178 | 0.165 | 0.152 | 0.137 | 0.124 |
| V75 | 0.038 | 0.035 | 0.033 | 0.03  | 0.027 | 0.025 |
| R76 | 0.164 | 0.154 | 0.142 | 0.131 | 0.118 | 0.107 |

|      |       |       |       |       |       |       |
|------|-------|-------|-------|-------|-------|-------|
| G77  | 0.582 | 0.546 | 0.505 | 0.465 | 0.42  | 0.38  |
| I78  | 0.052 | 0.049 | 0.045 | 0.042 | 0.038 | 0.034 |
| L79  | 0.03  | 0.028 | 0.026 | 0.024 | 0.021 | 0.019 |
| R80  | 0.139 | 0.131 | 0.121 | 0.111 | 0.101 | 0.091 |
| N81  | 0.972 | 0.911 | 0.844 | 0.777 | 0.702 | 0.635 |
| A82  | 0.396 | 0.371 | 0.344 | 0.317 | 0.286 | 0.259 |
| K83  | 0.173 | 0.162 | 0.15  | 0.138 | 0.125 | 0.113 |
| L84  | 0.066 | 0.062 | 0.058 | 0.053 | 0.048 | 0.043 |
| K85  | 0.107 | 0.1   | 0.093 | 0.085 | 0.077 | 0.07  |
| P86  |       |       |       |       |       |       |
| V87  | 0.022 | 0.02  | 0.019 | 0.017 | 0.016 | 0.014 |
| Y88  | 0.074 | 0.069 | 0.064 | 0.059 | 0.053 | 0.048 |
| D89  | 0.293 | 0.276 | 0.257 | 0.237 | 0.215 | 0.195 |
| S90  | 0.342 | 0.323 | 0.301 | 0.279 | 0.253 | 0.23  |
| L91  | 0.1   | 0.094 | 0.087 | 0.08  | 0.072 | 0.065 |
| D92  | 0.161 | 0.152 | 0.141 | 0.13  | 0.118 | 0.107 |
| A93  | 0.146 | 0.138 | 0.128 | 0.119 | 0.108 | 0.098 |
| V94  | 0.038 | 0.035 | 0.033 | 0.03  | 0.027 | 0.025 |
| R95  | 0.164 | 0.154 | 0.142 | 0.131 | 0.118 | 0.107 |
| R96  | 0.375 | 0.352 | 0.326 | 0.3   | 0.271 | 0.245 |
| A97  | 0.315 | 0.295 | 0.273 | 0.251 | 0.227 | 0.205 |
| A98  | 0.19  | 0.178 | 0.165 | 0.152 | 0.137 | 0.124 |
| A99  | 0.19  | 0.178 | 0.165 | 0.152 | 0.137 | 0.124 |
| I100 | 0.035 | 0.033 | 0.031 | 0.028 | 0.025 | 0.023 |
| N101 | 0.345 | 0.323 | 0.3   | 0.276 | 0.249 | 0.225 |
| M102 | 0.388 | 0.364 | 0.337 | 0.31  | 0.28  | 0.253 |
| V103 | 0.048 | 0.045 | 0.042 | 0.039 | 0.035 | 0.032 |
| F104 | 0.08  | 0.075 | 0.069 | 0.064 | 0.058 | 0.052 |
| Q105 | 0.252 | 0.236 | 0.219 | 0.201 | 0.182 | 0.164 |
| M106 | 0.294 | 0.276 | 0.256 | 0.235 | 0.213 | 0.192 |
| G107 | 0.452 | 0.424 | 0.392 | 0.361 | 0.326 | 0.295 |
| E108 | 0.241 | 0.227 | 0.211 | 0.195 | 0.177 | 0.16  |
| T109 | 0.14  | 0.132 | 0.123 | 0.114 | 0.104 | 0.095 |
| G110 | 0.556 | 0.521 | 0.483 | 0.444 | 0.401 | 0.363 |
| V111 | 0.056 | 0.052 | 0.048 | 0.045 | 0.04  | 0.036 |
| A112 | 0.137 | 0.129 | 0.119 | 0.11  | 0.099 | 0.09  |
| G113 | 0.351 | 0.329 | 0.305 | 0.28  | 0.253 | 0.229 |
| F114 | 0.163 | 0.153 | 0.141 | 0.13  | 0.118 | 0.106 |
| T115 | 0.188 | 0.176 | 0.163 | 0.15  | 0.136 | 0.123 |
| N116 | 0.928 | 0.87  | 0.806 | 0.742 | 0.67  | 0.606 |
| S117 | 0.928 | 0.87  | 0.806 | 0.742 | 0.67  | 0.606 |

|      |       |       |       |       |       |       |
|------|-------|-------|-------|-------|-------|-------|
| L118 | 0.1   | 0.094 | 0.087 | 0.08  | 0.072 | 0.065 |
| R119 | 0.139 | 0.131 | 0.121 | 0.111 | 0.101 | 0.091 |
| M120 | 0.308 | 0.289 | 0.268 | 0.246 | 0.223 | 0.201 |
| L121 | 0.065 | 0.061 | 0.056 | 0.052 | 0.047 | 0.042 |
| Q122 | 0.134 | 0.126 | 0.117 | 0.107 | 0.097 | 0.088 |
| Q123 | 0.345 | 0.323 | 0.3   | 0.276 | 0.249 | 0.225 |
| K124 | 0.274 | 0.257 | 0.238 | 0.219 | 0.198 | 0.179 |
| R125 | 0.298 | 0.279 | 0.259 | 0.238 | 0.215 | 0.195 |
| W126 | 0.122 | 0.115 | 0.106 | 0.098 | 0.088 | 0.08  |
| D127 | 0.203 | 0.191 | 0.178 | 0.164 | 0.149 | 0.135 |
| E128 | 0.125 | 0.119 | 0.111 | 0.103 | 0.094 | 0.086 |
| A129 | 0.163 | 0.154 | 0.144 | 0.133 | 0.121 | 0.11  |
| A130 | 0.19  | 0.178 | 0.165 | 0.152 | 0.137 | 0.124 |
| V131 | 0.038 | 0.035 | 0.033 | 0.03  | 0.027 | 0.025 |
| N132 | 0.424 | 0.398 | 0.368 | 0.339 | 0.306 | 0.277 |
| L133 | 0.105 | 0.098 | 0.091 | 0.084 | 0.076 | 0.069 |
| A134 | 0.117 | 0.11  | 0.101 | 0.093 | 0.084 | 0.076 |
| K135 | 0.173 | 0.162 | 0.15  | 0.138 | 0.125 | 0.113 |
| S136 | 0.586 | 0.549 | 0.509 | 0.468 | 0.423 | 0.383 |
| R137 | 0.451 | 0.423 | 0.391 | 0.36  | 0.326 | 0.294 |
| W138 | 0.122 | 0.115 | 0.106 | 0.098 | 0.088 | 0.08  |
| Y139 | 0.079 | 0.074 | 0.069 | 0.063 | 0.057 | 0.052 |
| N140 | 0.657 | 0.616 | 0.571 | 0.525 | 0.475 | 0.429 |
| Q141 | 0.455 | 0.426 | 0.395 | 0.363 | 0.328 | 0.297 |
| T142 | 0.258 | 0.242 | 0.224 | 0.206 | 0.186 | 0.168 |
| P143 |       |       |       |       |       |       |
| N144 | 0.337 | 0.316 | 0.293 | 0.269 | 0.243 | 0.22  |
| R145 | 0.472 | 0.443 | 0.41  | 0.378 | 0.341 | 0.309 |
| A146 | 0.315 | 0.295 | 0.273 | 0.251 | 0.227 | 0.205 |
| K147 | 0.173 | 0.162 | 0.15  | 0.138 | 0.125 | 0.113 |
| R148 | 0.298 | 0.279 | 0.259 | 0.238 | 0.215 | 0.195 |
| V149 | 0.062 | 0.059 | 0.054 | 0.05  | 0.045 | 0.041 |
| I150 | 0.026 | 0.024 | 0.022 | 0.02  | 0.018 | 0.017 |
| T151 | 0.096 | 0.09  | 0.083 | 0.077 | 0.069 | 0.063 |
| T152 | 0.258 | 0.242 | 0.224 | 0.206 | 0.186 | 0.168 |
| F153 | 0.174 | 0.164 | 0.152 | 0.14  | 0.126 | 0.114 |
| R154 | 0.262 | 0.245 | 0.227 | 0.209 | 0.189 | 0.171 |
| T155 | 0.27  | 0.253 | 0.234 | 0.216 | 0.195 | 0.176 |
| G156 | 0.556 | 0.521 | 0.483 | 0.444 | 0.401 | 0.363 |
| T157 | 0.241 | 0.226 | 0.209 | 0.192 | 0.174 | 0.157 |
| W158 | 0.117 | 0.11  | 0.101 | 0.093 | 0.084 | 0.076 |

|      |       |       |       |       |       |       |
|------|-------|-------|-------|-------|-------|-------|
| D159 | 0.203 | 0.191 | 0.178 | 0.164 | 0.149 | 0.135 |
| A160 | 0.146 | 0.138 | 0.128 | 0.119 | 0.108 | 0.098 |
| Y161 | 0.102 | 0.095 | 0.088 | 0.081 | 0.074 | 0.066 |
| K162 | 0.194 | 0.182 | 0.168 | 0.155 | 0.14  | 0.127 |
| N163 | 0.772 | 0.724 | 0.671 | 0.617 | 0.558 | 0.504 |
| L164 |       |       |       |       |       |       |

---



**Table S5.** Absolute values of  $^{15}\text{N}$  chemical shift differences (in ppm) for L99A at various pressures for residues L7, K19, H31, E64, K65, M120, and S136 extracted by CPMG relaxation dispersion NMR spectroscopy.

|      | 1bar | 200bar | 500bar | 700bar | 1000bar | 1500bar |
|------|------|--------|--------|--------|---------|---------|
| L7   | 2.6  | 2.8    |        |        |         |         |
| K19  | 1.4  | 1.4    |        | 1.8    | 2.2     | 1.9     |
| H31  | 1.7  | 1.7    | 1.9    | 2.0    | 2.6     | 1.8     |
| E64  | 1.5  | 1.7    | 1.7    | 2.1    | 2.4     | 1.7     |
| K65  | 1.4  | 1.2    | 1.5    | 1.7    | 1.5     |         |
| M120 | 1.2  | 1.4    | 1.3    | 1.6    | 1.9     | 1.2     |
| S136 | 2.1  | 2.2    | 3.3    | 3.7    |         |         |

## SI References

1. P. Vallurupalli, D. F. Hansen, P. Lundström, L. E. Kay, CPMG relaxation dispersion NMR experiments measuring glycine  $^1\text{H}_\alpha$  and  $^{13}\text{C}_\alpha$  chemical shifts in the 'invisible' excited states of proteins. *J. Biomol. NMR* **45**, 45–55 (2009).
2. Y. Bai, T. R. Sosnick, L. Mayne, S. W. Englander, Protein folding intermediates: Native-state hydrogen exchange. *Science* **269**, 192–197 (1995).
3. M. Xue, R. Kitahara, Y. Yoshimura, F. A. A. Mulder, Aberrant increase of NMR signal in hydrogen exchange experiments. Observation and explanation. *Biochem. Biophys. Res. Commun.* **478**, 1185–1188 (2016).
4. E. J. Fuentes, A. J. Wand, Local stability and dynamics of apocytochrome  $b_{562}$  examined by the dependence of hydrogen exchange on hydrostatic pressure. *Biochemistry* **37**, 9877–9883, (1998).
5. Y. Bai, J. S. Milne, L. Mayne, S. W. Englander, Primary structure effects on peptide group hydrogen exchange. *Proteins* **17**, 75–86 (1993).
6. S. A. Mabry, B.-S. Lee, T. Zheng, J. Jonas, Determination of the activation volume of the uncatalyzed hydrogen exchange reaction between N-methylacetamide and water. *J. Am. Chem. Soc.* **118**, 8887–8890 (1996).
7. J. Hauer, K. Müller, H.-D. Lüdemann, R. Jaenicke, The pressure dependence of the histidine ring protonation constant studied by  $^1\text{H}$  HR-NMR. *FEBS Lett.* **135**, 135–138 (1981).
8. S. K. Min, C. P. Samaranayake, S. K. Sastry, In situ measurement of reaction volume and calculation of pH of weak acid buffer solutions under high pressure. *J. Phys. Chem. B* **115**, 6564–6571 (2011).
9. F. A. A. Mulder, A. Mittermaier, B. Hon, F. W. Dahlquist, L. E. Kay, Studying excited states of proteins by NMR spectroscopy. *Nat. Struct. Biol.* **8**, 932–935, (2001).
10. G. Bouvignies, P. Vallurupalli, D. F. Hansen, B. E. Correia, O. Lange, A. Bah, R. M. Vernon, F. W. Dahlquist, D. Baker, L. E. Kay, Solution structure of a minor and transiently formed state of a T4 lysozyme mutant. *Nature* **477**, 111–114, (2011).
11. F. A. A. Mulder, B. Hon, A. Mittermaier, F. W. Dahlquist, L. E. Kay, Slow internal dynamics in proteins: Application of NMR relaxation dispersion spectroscopy to methyl groups in a cavity mutant of T4 lysozyme. *J. Am. Chem. Soc.* **124**, 1443–1451 (2002).
12. J. P. Carver, R. E. Richards, General 2-site solution for chemical exchange produced dependence of  $T_2$  upon Carr-Purcell pulse separation. *J. Magn. Reson.* **6**, 89–105 (1972).
